# Supplementary material for: Drug-like molecules with anti-trypanothione synthetase activity identified by high throughput screening
Source: PubMed Central journal article supplement — J Enzyme Inhib Med Chem. 2022 Mar 21;37(1):912–29. doi: 10.1080/14756366.2022.2045590 (PMC8942522; doi:10.1080/14756366.2022.2045590), 2022-03-21
Supplement: IENZ_A_2045590_SM1500.pdf [file IENZ_A_2045590_SM1500.pdf]

## SUPPLEMENTAL MATERIALS

### Standard Operation Procedure (SOP) for *Trypanosoma brucei* Trypanothione Synthetase High-Throughput Screening

#### Description

The assay is designed in a 384 well plate to screen 4,210 compounds from *LOPAC*® (*SIGMA*), *Selleck Chemicals*, *NIH Clinical* and *TOCRIS* libraries (pilot screening) and then 47,414 small molecules from *ENAMINE* library, against the enzyme trypanothione synthetase from *Trypanosoma brucei* (*TbTryS*). *TbTryS* uses glutathione, spermidine and ATP as substrates. ATP is hydrolyzed to produce inorganic phosphate and this is quantified using a commercial version of malachite green called *BIOMOL GREEN*<sup>TM</sup> reagent.

All the steps were performed by the ADS (Assay Development and Screening group), except for those specifically pointed, which were performed by the LRL (Leishmania Research Laboratory) or the ALM (Automation and Logistics Management group).

#### Purpose

Find inhibitors of *TbTryS*.

#### Equipment and consumables required

##### ▪ Equipment

- Personal Pipettor liquid handler (Apricot Designs)
- VCode (Agilent Technologies. Room - R5.29)
- Matrix Wellmate Microplate Dispenser (Thermo Fisher Scientific)
- Multidrop<sup>TM</sup> Combi Reagent Dispenser (Thermo Fisher Scientific)
- 8ch. Small-bore Disposable cartridge (tube) for Wellmate (Thermo Fisher Scientific, 201-30002)
- Robotic arm Plate Handler II (Perkin Elmer)
- Envision multilabel reader (Perkin Elmer)
- Centrifuge (Eppendorf)
- Pipette 100p, 200p, and 1000p (Gilson)
- Pipette aid

##### ▪ Consumables

- 50 mL conical tubes (Falcon 352070)

- 384 well plate (Greiner 781101)
- Finntip 50 (Thermo Fisher Scientific 9400360)
- 5 mL serological pipette (Falcon 357543)
- 10 mL serological pipette (Falcon 357551)
- 25 mL serological pipette (Falcon 357525)
- 250 mL storage bottle (Corning CC-430281)
- 500 mL storage bottle (Corning CC-430282)
- 1 L storage bottle (Corning CC-430518)
- Reservoir (Corning CT-4870)
- Biohazard autoclave bag

## Chemicals and Solutions

- Spermidine (Sigma 85558)
- ATP (Sigma A2383)
- Glutathione (Sigma G4251)
- DTT (APPLICHEM A1101)
- BIOMOL GREEN<sup>TM</sup> reagent (Enzo Life Science BML-AK111)
- DMSO (Sigma 472301)
- EDTA (Sigma E5134)
- NaCl (Sigma 71376)
- HEPES (Sigma H3375)
- MgSO<sub>4</sub> (Sigma 230391)
- Reaction buffer: 100 mM HEPES, 0.5 mM EDTA, 10 mM MgSO<sub>4</sub>, pH 7.4
- Enzyme stock: *Tb*TryS enzyme in reaction buffer 1 mM DTT and 150 mM NaCl

## Preparation of Materials

### 1. Stock reagent solution (LRL)

Reaction buffer and enzyme (dilution prepared from enzyme stock in reaction buffer)

### 2. Plate barcoding (ALM)

The Barcode of plates are labelled by the VCode

### 3. Controls stock solution

Prepare 20% DMSO in 3' distilled water (2 mL of DMSO + 8 mL of 3' distilled water)

## Assay process

### 1. Wellmate preparation

- Connect the Wellmate dispense cartridge into Wellmate machine
- Turn on the Wellmate (Switch is backside of the machine)
- Control the speed of the Wellmate dispense (speed 2)
- Wash the tubing with 70% EtOH
- Wash the tubing with distilled water

### 2. Enzyme preparation (LRL)

### 3. Master mix (MM) preparation (LRL)

### 4. Compound plate preparation with the Personal Pipettor liquid handler (ALM)

- 96 well Mother Plate (MPL): 100  $\mu$ L compounds at 10 mM (DMSO 100%)
- 384 well Intermediate Plate (IPL): dilution 1:5 (20  $\mu$ L + 80  $\mu$ L DMSO) are performed to obtain a 2 mM solution (DMSO 100%)
- 384 Daughter Plate (DPL): dilution 1:5 (20  $\mu$ L + 80  $\mu$ L 3' distilled water) in 384 Daughter Plate (DPL) to obtain a 0.4 mM (20% DMSO-80% distilled water)

*Note: Column 1 and 12 in the 96 well plate and 1, 2, 23 and 24 in 384 well plate are used for controls*

### 5. Compound/ DMSO transfer by Personal Pipettor liquid handler (Apricot Designs) (ALM)

Dispense 1  $\mu$ L of compound or DMSO from the DPL to the assay plate

### 6. Dispense reaction buffer (“inhibition control”)

- Prepare Wellmate equipment and reaction buffer as above
- Prime the cassette tubing with reaction buffer
- Dispense 10  $\mu$ L (final volume 11  $\mu$ L) of enzyme buffer (not the enzyme) into columns **23 and 24** by Wellmate

### 7. Dispense enzyme

- Prepare Wellmate equipment an enzyme as above
- Prime the cassette tubing with enzyme
- Dispense 10  $\mu$ L of the prepared enzyme dilution to columns **1 to 22** in the plates by Wellmate
- Speed down 200g, 1 s

### 8. Incubation for 1 h at room temperature (RT)

### 9. Dispense MM

- Prepare Wellmate equipment and MM as above
- Prime the cassette tubing with MM

- Dispense 5  $\mu\text{L}$  (final volume 16  $\mu\text{L}$ ) of the prepared MM solution in the whole plate by Wellmate
- Speed down 200g, 1 s

#### **10. Incubation for 1 h at RT**

#### **11. Dispense EDTA 210 mM**

- Prepare Wellmate equipment and EDTA as above
- Prime the cassette tubing with EDTA
- Dispense 5  $\mu\text{L}$  (final volume 21  $\mu\text{L}$ ) of the EDTA 210 mM to stop the reaction by Wellmate
- Speed down 200g, 1 s

#### **12. Transfer plate to the tower in Cell explore (room - R5.11)**

- Put the plates to stacker (hotel, check the position, number and turn)

#### **13. Preparation Cell explore (by ALM)**

- Prepare Combi equipment and BIOMOL GREEN<sup>TM</sup> reagent as above
- Prime the cassette tubing with BIOMOL GREEN<sup>TM</sup> reagent
- Open the Cell explore control program and load protocol
- Start program by ALM
- Dispense 60  $\mu\text{L}$  of BIOMOL GREEN<sup>TM</sup> reagent (final volume 81  $\mu\text{L}$ ) to all the wells in the whole plate by Combi by automatic
- Incubation 20 min in RT by automatic
- Reading plate with ENVISION by automatic
- After reading plate put the stacker (hotel) by automatic

#### **14. Collect plate and seal plate**

- When the reading is done, remove the plates carefully
- Put the plate back in the carrier, and transport to out of room - R5.11

Figure S1.

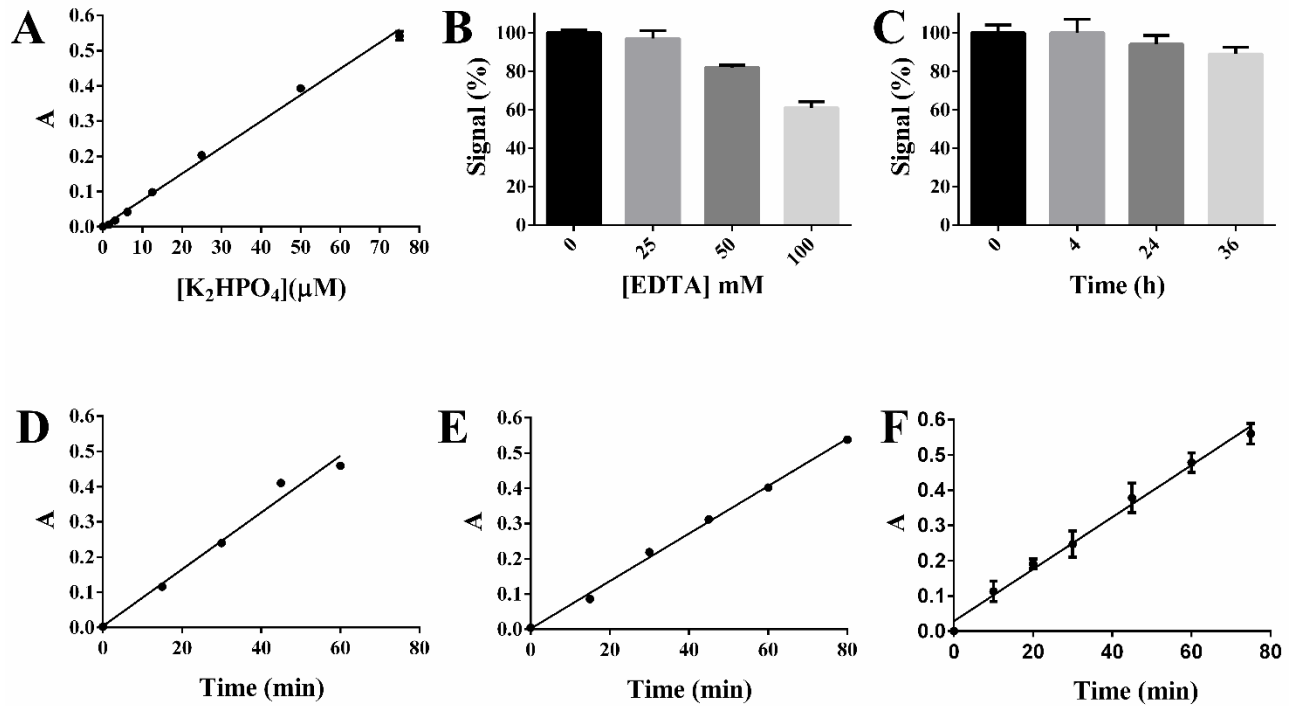

**TryS assay performance.** **A) A<sub>620 nm</sub> vs. K<sub>2</sub>HPO<sub>4</sub> concentration µM.** Under reaction conditions resembling the screening assay for *Leishmania infantum* trypanothione synthetase (*LiTryS*) and using KH<sub>2</sub>PO<sub>4</sub> as inorganic phosphate source, the detection limit, slope and linearity range of the colorimetric reaction with BIOMOL GREEN<sup>TM</sup> was estimated to be ~ 0.9 µM, 0.0074 ± 0.0002 UA/µM and 1.6-75 µM, respectively. **B) Signal (%) vs. EDTA concentration mM.** EDTA was added at 0, 25, 50 and 100 mM to a solution containing at 50 µM KH<sub>2</sub>PO<sub>4</sub>. Although it decreases ~18% assay sensitivity, 50 mM EDTA was selected to stop the TryS reaction via Mg<sup>++</sup> chelation. **C) Signal (%) vs. Time (h).** Signal stability (50 µM KH<sub>2</sub>PO<sub>4</sub> + BIOMOL GREEN<sup>TM</sup> + 50 mM EDTA) was evaluated over time. After 36 h, signal drop down only ~ 11%. For the three experiments outlined above, KH<sub>2</sub>PO<sub>4</sub> was dissolved in *LiTryS* master mix. Although the GSH concentration using in the master mix varies for each enzyme, in the range used, this reagent does not affect signal development (Benítez, 2016). **A<sub>620 nm</sub> vs. Time (h) for D) *Trypanosoma cruzi* TryS, E) *LiTryS* and F) *T. brucei* TryS.** The development of signal (A<sub>620nm</sub>) was determined at different time points for each TryS. All assays displayed a linear relation for signal vs. time at least up to 60 min.

**Table S1: Inhibition of Tri-Tryp trypanothione synthetase (TryS).**

| #  | Compounds                        | Core      | TryS inhibition $\pm$ SD at 25 $\mu$ M (%) or $IC_{50}$ ( $\pm$ SD) ( $\mu$ M) |                                  |                                  |
|----|----------------------------------|-----------|--------------------------------------------------------------------------------|----------------------------------|----------------------------------|
|    |                                  |           | <i>TcTryS</i>                                                                  | <i>LiTryS</i>                    | <i>TbTryS</i>                    |
| 1  | Aurintricarboxylic acid          | Singleton | 5.5 $\pm$ 2.8                                                                  | <b>4.6 <math>\pm</math> 0.7</b>  | 8.2 $\pm$ 0.6                    |
| 2  | 4-Chloromercuribenzoic acid      | Singleton | 32.0 $\pm$ 9.7                                                                 | 1.6 $\pm$ 14.1                   | <b>2.2 <math>\pm</math> 0.05</b> |
| 3  | Morin (Flavonol)                 | Singleton | NA                                                                             | NA                               | NA                               |
| 4  | 6-Hydroxy-DL-DOPA                | Singleton | <b>16.8 <math>\pm</math> 2.8</b>                                               | <b>4.0 <math>\pm</math> 1.4</b>  | <b>13.0 <math>\pm</math> 3.5</b> |
| 5  | NH125                            | Singleton | <b>15.5 <math>\pm</math> 2.9</b>                                               | <b>25.7 <math>\pm</math> 2.6</b> | <b>12 <math>\pm</math> 2.5</b>   |
| 6  | Ebselen                          | Singleton | <b>13.8 <math>\pm</math> 1.5</b>                                               | <b>2.6 <math>\pm</math> 0.2</b>  | <b>5.3 <math>\pm</math> 0.2</b>  |
| 7  | Sanguinarine chloride            | Singleton | <b>40.0 <math>\pm</math> 1.2</b>                                               | <b>11.6 <math>\pm</math> 0.4</b> | <b>3.3 <math>\pm</math> 0.4</b>  |
| 8  | Calmidazolium chloride           | Singleton | <b>2.7 <math>\pm</math> 0.5</b>                                                | <b>1.6 <math>\pm</math> 0.8</b>  | <b>9.5 <math>\pm</math> 2.5</b>  |
| 9  | Piceatannol                      | Singleton | NA                                                                             | NA                               | NA                               |
| 10 | SCH 202676 hydrobromide          | Singleton | 43.4 $\pm$ 5.7                                                                 | <b>3.0 <math>\pm</math> 0.8</b>  | <b>3.7 <math>\pm</math> 0.5</b>  |
| 11 | SAM002548975 (Raloxifene)        | Singleton | 24.5 $\pm$ 7.0                                                                 | 41.3 $\pm$ 4.9                   | NA                               |
| 12 | PD 404,182                       | Singleton | 10.9 $\pm$ 5.6                                                                 | 8.9 $\pm$ 5.9                    | <b>15.3 <math>\pm</math> 1.1</b> |
| 13 | Demethylasterriquinone B1        | Singleton | 27.7 $\pm$ 7.6                                                                 | 69.3 $\pm$ 3.5                   | 31.0 $\pm$ 7.0                   |
| 14 | CGP 71683 hydrochloride          | Singleton | 34.7 $\pm$ 7.6                                                                 | <b>13.9 <math>\pm</math> 1.8</b> | 14.4 $\pm$ 8.2                   |
| 15 | Carvedilol                       | Singleton | NA                                                                             | 15.2 $\pm$ 12.7                  | 23.7 $\pm$ 6.4                   |
| 16 | Tin protoporphyrin IX dichloride | Singleton | 18.7 $\pm$ 10.4                                                                | 5.1 $\pm$ 7.4                    | 13.8 $\pm$ 11.2                  |
| 17 | PQ 401                           | Singleton | 6.2 $\pm$ 5.6                                                                  | NA                               | <b>1.5 <math>\pm</math> 0.4</b>  |
| 18 | Tetrindole mesylate              | Singleton | 28.9 $\pm$ 7.5                                                                 | NA                               | 26.0 $\pm$ 4.6                   |
| 19 | WIN 64338 hydrochloride          | Singleton | 25.9 $\pm$ 6.5                                                                 | 70.9 $\pm$ 6.8                   | 9.2 $\pm$ 7.4                    |
| 20 | Nutlin-3                         | Singleton | NA                                                                             | NA                               | 39.8 $\pm$ 5.2                   |
| 21 | Z102601424                       | CPA       | NA                                                                             | 12.6 $\pm$ 15.1                  | NA                               |
| 22 | Z1081732798                      | CP        | 6.2 $\pm$ 0.9                                                                  | 10.4 $\pm$ 8.9                   | 38.1 $\pm$ 7.2                   |
| 23 | Z109494586                       | CPz       | 7.1 $\pm$ 4.0                                                                  | 16.8 $\pm$ 17.9                  | <b>8.0 <math>\pm</math> 1.8</b>  |
| 24 | Z113169536                       | CPz       | NA                                                                             | NA                               | NA                               |
| 25 | Z1188133056                      | Singleton | NA                                                                             | NA                               | <b>~ 25</b>                      |
| 26 | Z1223157898                      | Singleton | NA                                                                             | NA                               | 40.0 $\pm$ 5.8                   |
| 27 | Z1291366164                      | Singleton | NA                                                                             | NA                               | 24.3 $\pm$ 2.4                   |
| 28 | Z13598484                        | Singleton | NA                                                                             | NA                               | NA                               |
| 29 | Z13601063                        | Singleton | NA                                                                             | NA                               | <b>28.0 <math>\pm</math> 4.5</b> |
| 30 | Z145119580                       | AMPh      | NA                                                                             | NA                               | 15.5 $\pm$ 9.4                   |
| 31 | Z145386962                       | AMTPh     | NA                                                                             | NA                               | NA                               |
| 32 | Z147103388                       | Singleton | NA                                                                             | NA                               | <b>1.2 <math>\pm</math> 0.2</b>  |
| 33 | Z1547375509                      | Singleton | NA                                                                             | 28.5 $\pm$ 41.1                  | <b>15.2 <math>\pm</math> 3.7</b> |
| 34 | Z165123846                       | AMPh      | NA                                                                             | 27.7 $\pm$ 28.1                  | NA                               |
| 35 | Z167605396                       | APh       | NA                                                                             | NA                               | NA                               |
| 36 | Z19222119                        | Singleton | NA                                                                             | NA                               | NA                               |
| 37 | Z199816662                       | Singleton | NA                                                                             | NA                               | NA                               |
| 38 | Z212978220                       | Singleton | NA                                                                             | NA                               | 40.4 $\pm$ 5.8                   |
| 39 | Z21459859                        | Singleton | 13.3 $\pm$ 3.3                                                                 | NA                               | <b>36.2 <math>\pm</math> 2.6</b> |
| 40 | Z220425080                       | Singleton | NA                                                                             | NA                               | NA                               |
| 41 | Z223988664                       | APh       | NA                                                                             | NA                               | 10.3 $\pm$ 6.6                   |
| 42 | Z224029074                       | APh       | NA                                                                             | NA                               | NA                               |
| 43 | Z225233562                       | AMTPh     | NA                                                                             | NA                               | <b>20.3 <math>\pm</math> 4.6</b> |
| 44 | Z225677598                       | CPA       | 5.5 $\pm$ 0.8                                                                  | NA                               | 37.1 $\pm$ 4.7                   |
| 45 | Z227072034                       | AMTPh     | NA                                                                             | NA                               | <b>8.4 <math>\pm</math> 0.9</b>  |
| 46 | Z227978766                       | Singleton | 12.9 $\pm$ 6.1                                                                 | 74.4 $\pm$ 18.1                  | NA                               |
| 47 | Z24194344                        | CPh       | NA                                                                             | NA                               | NA                               |
| 48 | Z244772346                       | AMPh      | NA                                                                             | NA                               | <b>28.2 <math>\pm</math> 1.3</b> |
| 49 | Z27611228                        | CPz       | NA                                                                             | NA                               | 7.2 $\pm$ 3.0                    |
| 50 | Z280049026                       | Singleton | NA                                                                             | NA                               | NA                               |
| 51 | Z29053217                        | A2T       | NA                                                                             | NA                               | NA                               |
| 52 | Z29458018                        | A2T       | NA                                                                             | 13.3 $\pm$ 10.5                  | NA                               |
| 53 | Z300598652                       | Singleton | NA                                                                             | NA                               | NA                               |
| 54 | Z318180488                       | AMPh      | NA                                                                             | NA                               | <b>13.1 <math>\pm</math> 0.7</b> |
| 55 | Z32477432                        | CP/APh    | NA                                                                             | NA                               | NA                               |
| 56 | Z325706758                       | CPh       | NA                                                                             | NA                               | 34.1 $\pm$ 6.0                   |
| 57 | Z33583129                        | APh       | NA                                                                             | NA                               | NA                               |
| 58 | Z339431458                       | CPz       | NA                                                                             | NA                               | 27.0 $\pm$ 28.4                  |
| 59 | Z339866610                       | CPA       | NA                                                                             | NA                               | <b>26.4 <math>\pm</math> 0.9</b> |
| 60 | Z339869040                       | AMPh      | NA                                                                             | NA                               | 27.5 $\pm$ 9.5                   |
| 61 | Z356216222                       | Singleton | NA                                                                             | NA                               | NA                               |
| 62 | Z357307658                       | Singleton | NA                                                                             | NA                               | 18.6 $\pm$ 5.6                   |
| 63 | Z363062290                       | CPA       | 8.8 $\pm$ 7.3                                                                  | NA                               | <b>18.4 <math>\pm</math> 2.5</b> |

|    |             |           |    |            |             |
|----|-------------|-----------|----|------------|-------------|
| 64 | Z367586420  | CPA       | NA | NA         | 12.7 ± 9.8  |
| 65 | Z423190460  | Singleton | NA | NA         | NA          |
| 66 | Z423365454  | CP        | NA | NA         | NA          |
| 67 | Z431613218  | CP        | NA | NA         | 31.8 ± 2.1  |
| 68 | Z436803656  | AMPh      | NA | NA         | 29.0 ± 5.1  |
| 69 | Z44454993   | Singleton | NA | NA         | NA          |
| 70 | Z46336887   | AMPh      | NA | NA         | NA          |
| 71 | Z51971326   | AMTPh     | NA | NA         | 19.9 ± 2.7  |
| 72 | Z55659431   | Singleton | NA | NA         | NA          |
| 73 | Z572699208  | CPA       | NA | NA         | ~ 25        |
| 74 | Z64547920   | CPh       | NA | NA         | 35.8 ± 3.9  |
| 75 | Z650921460  | AMPh      | NA | NA         | NA          |
| 76 | Z666948054  | Singleton | NA | NA         | 37.1 ± 13.9 |
| 77 | Z804115708  | Singleton | NA | NA         | NA          |
| 78 | Z89695286   | Singleton | NA | 19.7 ± 7.4 | 11.6 ± 4.6  |
| 79 | Z95751789   | AMPh      | NA | NA         | NA          |
| 80 | Z95976280   | CPA       | NA | NA         | 12.0 ± 2.6  |
| 81 | Z98408834   | CP        | NA | NA         | 33.7 ± 6.1  |
| 82 | Z2241128018 | Singleton | NA | 43.1 ± 4.2 | NA          |

The first 20 compounds belong to the pilot screening and the rest to the large (*ENAMINE* library) screening. Compounds inhibiting TryS by 45-55% at 25 µM an estimated value of ~25 µM is provided. When enzyme inhibition is ≤ 0.0 ± 5.0 % the activity is expressed as not active (NA). #, Number; IC<sub>50</sub>, Half-maximum inhibitory concentration; SD, Standard deviation; *Tc*, *Trypanosoma cruzi*; *Li*, *Leishmania infantum*; *Tb*, *Trypanosoma brucei*. Compounds core structure abbreviations: CPA; Carboxy piperidine amide, AMTPh; Amide methylene thiazole phenyl, AMPh; Amide methylene phenyl, APh; Amide phenyl, CP; Carboxy piperidine, CPz; Carboxy piperazine and CPh; Carboxy phenyl. Structural information of molecules belonging to the *ENAMINE* library can be retrieved from the company website (<https://www.enaminestore.com/search>) using the corresponding compound code.

## Equations for substrate inhibition (Torrie, 2009)

### Competitive high substrate inhibition

$$1/v = (K_M/X \times V_{max}) (1 + i/K_i) + (X/K_i^x \times V_{max}) (1 + i/K_i) + (1/V_{max})$$

### Uncompetitive high substrate inhibition

$$1/v = (K_M/X \times V_{max}) + (X/K_i^x \times V_{max}) + (i/K_i \times V_{max}) + (1/V_{max})$$

### Allosteric high substrate inhibition

$$1/v = (K_M/X \times V_{max}) + (X/K_i^x \times V_{max}) (1 + i/K_i) + (1/V_{max})$$

All the equations obey the following general equation:  
 $A/X$  (exponential term) +  $X/B$  (lineal term) +  $C$

Because of the high substrate inhibition exhibited by *TbTryS* with GSH and because it was not possible to decrease the concentration of this substrate below 75  $\mu\text{M}$ , the equations used to analyze data from varying GSH concentrations were simplified to the exponential term.

$i$ , inhibitor concentration.

$X$ , substrate concentration.

$K_M$ ,  $K_i$ ,  $V_{max}$ , are constants.



**Figure S2. Drug-likeness analysis.**

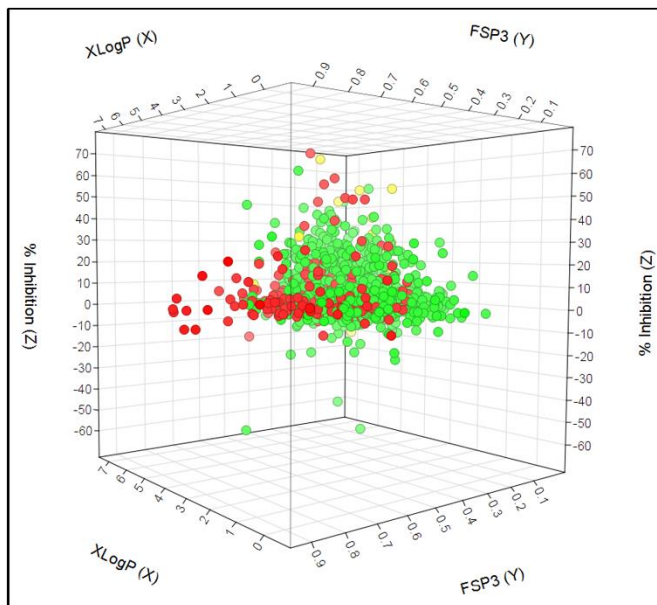

**Drug-likeness analysis of scaffold type vs. *TbTryS*.** *TbTryS* inhibition (%) (Z axis) vs. drug-likeness metrics, FSP3 (fraction of sp<sup>3</sup> hybridized or saturated carbons) (Y axis) and XLogP (lipophilicity, based on atoms contributions) (X axis) values. Scaffolds are showed as dots: CPA in red, AMTPh scaffold in yellow and AMPH scaffold in green. The CPA compounds may have better drug-likeness properties than the other scaffolds. FSP3 score of these compounds was greater than 0.3 (suggesting more flexible molecules) and XLogP values were less than 5. Compounds core structure abbreviations: CPA; Carboxy piperidine amide, AMTPh; Amide methylene thiazole phenyl and AMPH; Amide methylene phenyl.
